# Supplementary material
Source: PubMed Central journal article supplement (PMC2785447)
Supplement: NIHMS65591-supplement-Supp_Data.pdf [file NIHMS65591-supplement-Supp_Data.pdf]

**Supplementary Table S1. Detailed clinical information on R1070 patients with references.**

Abbreviations: n.a.—data not available; ref—patient referred to specified country; pers comm=personal communication with collaborator; diag=diagnosis; b=year of birth; dis=disease; FEV=forced expiratory volume; FVC=forced vital capacity; obstr lung dis=obstructive lung disease; def=deficiency; MI=meconium ileus; y=years; CFRD=Cystic Fibrosis-related diabetes; CBAVD=congenital bilateral absence of the vas deferens; CAVD=congenital absence of the vas deferens; PA=Pseudomonas aeruginosa; \* insufficient data to include patient; \*\* patient reported in Mickle *et al.*, 2000.

## A) Patients bearing R1070Q

| patient ID # | genotype (allele 1 / allele 2) | diagnosis (as per reference) | sex of patient | lung function and disease | pancreatic status | sweat chloride levels | other traits and conditions | country of origin | references for patient data                             |
|--------------|--------------------------------|------------------------------|----------------|---------------------------|-------------------|-----------------------|-----------------------------|-------------------|---------------------------------------------------------|
| #1           | R1070Q / E822X                 | classic CF                   | female         | mild disease              | insufficient      | 97.5 mmol/L           | b=1993, 1y (diag)           | Greece            | Tzetis M pers comm 2006, Canadian Database 2007         |
| #2           | R1070Q / 2789+5G>A             | nonclassic CF                | n.a.           | n.a.                      | sufficient        | n.a.                  | pancreatitis, b=1992        | Greece            | Tzetis M pers comm 2006                                 |
| #3           | R1070Q / S549N                 | CBAVD                        | male           | n.a.                      | n.a.              | n.a.                  | n.a.                        | Pakistan and Asia | Osborne 1993**                                          |
| #4           | R1070Q / D1152H                | CBAVD                        | male           | bronchiectasis            | n.a.              | 56 mmol/L             | 7t/7t, 37y (diag)           | France            | Bienvenu 1997, Feldmann 2003**                          |
| #5           | R1070Q / F1337V                | CBAVD                        | male           | n.a.                      | n.a.              | n.a.                  | n.a.                        | Holland           | Scheffer, Canadian Database 2007                        |
| #6*          | R1070Q / n.a.                  | nonclassic CF                | n.a.           | n.a.                      | n.a.              | n.a.                  | n.a.                        | Italy             | Audrezet 1993**                                         |
| #7*          | R1070Q / n.a.                  | CF                           | n.a.           | n.a.                      | insufficient      | n.a.                  | n.a.                        | Bulgaria          | Mercier 1993, Mercier 1994, Savov 1994, Estivill 1997** |
| #8*          | R1070Q / n.a.                  | CF                           | n.a.           | n.a.                      | n.a.              | n.a.                  | n.a.                        | Bulgaria          | Mercier 1993, 1994, Savov 1994, Estivill 1997**         |
| #9*          | R1070Q / n.a.                  | CF                           | n.a.           | n.a.                      | n.a.              | n.a.                  | n.a.                        | Albania           | Mercier 1993, Mercier 1994**                            |
| #10*         | R1070Q / n.a.                  | CF                           | n.a.           | n.a.                      | n.a.              | n.a.                  | n.a.                        | Romania           | Mercier 1993, Mercier 1994**                            |
| #11*         | R1070Q / n.a.                  | CF                           | n.a.           | n.a.                      | n.a.              | n.a.                  | n.a.                        | Bulgaria          | Savov 1994, Estivill 1997**                             |
| #12*         | R1070Q / n.a.                  | CF                           | n.a.           | n.a.                      | n.a.              | n.a.                  | n.a.                        | Bulgaria          | Savov 1994, Estivill 1997**                             |
| #13*         | R1070Q / n.a.                  | CBAVD                        | male           | n.a.                      | n.a.              | n.a.                  | n.a.                        | Iran (Spain ref.) | Casals T pers comm 2006                                 |

## B) Patients bearing R1070Q+S466X

| patient ID # | genotype (allele 1 / allele 2) | diagnosis (as per reference) | sex of patient | lung function and disease | pancreatic status | sweat chloride levels | other traits and conditions                               | country of origin | references for patient data                                        |
|--------------|--------------------------------|------------------------------|----------------|---------------------------|-------------------|-----------------------|-----------------------------------------------------------|-------------------|--------------------------------------------------------------------|
| #1*          | R1070Q+S466X / n.a.            | CF                           | n.a.           | n.a.                      | sufficient        | n.a.                  | n.a.                                                      | Bulgaria          | Mercier 1993, Mercier 1994, Savov 1994, Estivill 1997, Wang 2002** |
| #2           | R1070Q+S466X / R1070Q+S466X    | classic CF                   | n.a.           | FEV=79%, FVC=74%          | insufficient      | 99.3 mEq/l            | liver cirrhosis, PA (9y), birth (diag), b=1981            | Greece            | Tzetis M pers comm 2006                                            |
| #3           | R1070Q+S466X / N1303K          | classic CF                   | n.a.           | n.a.                      | insufficient      | n.a.                  | liver cirrhosis, MI, birth (diag), 1997-98                | Greece            | Tzetis M pers comm 2006                                            |
| #4           | R1070Q+S466X / F508del         | classic CF                   | n.a.           | mild disease              | insufficient      | 133 mEq/l             | PA (<1y), <1y (diag), b=1998                              | Greece            | Tzetis M pers comm 2006                                            |
| #5           | R1070Q+S466X / F508del         | classic CF                   | n.a.           | mild disease              | insufficient      | 87.7 mEq/l            | PA (1y), <1y (diag), b=1994                               | Greece            | Tzetis M pers comm 2006                                            |
| #6           | R1070Q+S466X / F508del         | classic CF                   | male           | FEV=84%, FVC=98%          | insufficient      | 104 no units          | b=1986, 1y (diag), CFRD, cirrhosis/liver dis (transplant) | USA               | CFF Registry 2005                                                  |
| #7           | R1070Q+S466X / 621+1G>T        | classic CF                   | n.a.           | n.a.                      | insufficient      | 98.4 mEq/l            | <1y (diag), b=1996                                        | Greece            | Tzetis M pers comm 2006                                            |
| #8           | R1070Q+S466X / 711+3A>G        | classic CF                   | n.a.           | n.a.                      | insufficient      | 73.8 mEq/l            | <1y (diag), b=1999                                        | Greece            | Tzetis M pers comm 2006                                            |
| #9           | R1070Q+S466X / F508del         | classic CF                   | n.a.           | mild disease              | insufficient      | 100.4 mEq/l           | PA (8y), b=1992                                           | Greece            | Tzetis M pers comm 2006                                            |
| #10*         | R1070Q+S466X / n.a.            | CF                           | n.a.           | n.a.                      | n.a.              | n.a.                  | n.a.                                                      | France            | Ferec C pers comm 2006                                             |
| #11          | R1070Q+S466X / F508del         | classic CF                   | female         | obstr lung dis; cough     | insufficient      | 93-96 mmol/L          | b=1997, 3 mo. (diag), PA, electrolyte def                 | Serbia-Montenegro | Radivojevic 2004, pers comm 2007                                   |
| #12          | R1070Q+S466X / F508del         | classic CF                   | female         | obstr lung dis; cough     | insufficient      | 91-103 mmol/L         | b=1997, 10 mo. (diag), electrolyte def                    | Serbia-Montenegro | Radivojevic 2004, pers comm 2007                                   |
| #13          | R1070Q+S466X / F508del         | classic CF                   | n.a.           | n.a.                      | n.a.              | 100 mEq/l             | steatorrhea, b=1995                                       | Greece            | Tzetis M pers comm 2007                                            |

## C) Patients bearing R1070W and F508del

| patient ID # | genotype (allele 1 / allele 2) | diagnosis (as per reference) | sex of patient | lung function and disease | pancreatic status | sweat chloride levels | other traits and conditions                          | country of origin | references for patient data                    |
|--------------|--------------------------------|------------------------------|----------------|---------------------------|-------------------|-----------------------|------------------------------------------------------|-------------------|------------------------------------------------|
| #1           | R1070W / F508del               | CBAVD                        | male           | n.a.                      | n.a.              | 36 mEq/l              | tg10t9/tg10t7, 32y (2000)                            | France            | Jezequel 1995, Jezequel 2000, Claustres 2000** |
| #2           | R1070W / F508del               | CBAVD                        | male           | n.a.                      | n.a.              | n.a.                  | tg10t9/tg10t7, 36y (2000)                            | France            | Jezequel 1995, Jezequel 2000, Claustres 2000** |
| #3*          | R1070W / F508del               | CBAVD                        | male           | n.a.                      | n.a.              | n.a.                  | n.a.                                                 | France            | Claustres 2000                                 |
| #4*          | R1070W / F508del               | CF                           | male           | n.a.                      | n.a.              | n.a.                  | CBAVD                                                | France            | Claustres 2000                                 |
| #5*          | R1070W / F508del               | CF                           | male           | n.a.                      | n.a.              | n.a.                  | CBAVD                                                | France            | Claustres 2000                                 |
| #6           | R1070W / F508del               | nonclassic CF                | n.a.           | n.a.                      | n.a.              | 30.5 mmol/L           | 0.4y (diag), neonatal hypertrypsinemia               | France            | Feldmann 2000                                  |
| #7           | R1070W / F508del               | nonclassic CF                | female         | slight bronchiectasis     | no disease        | 45 mmol/L             | subfertile (diag as adult), 40y (1996)               | France            | Gervais 1996**                                 |
| #8           | R1070W / F508del               | CBAVD                        | male           | no disease                | no disease        | n.a.                  | n.a.                                                 | France            | Gervais 1996**                                 |
| #9           | R1070W / F508del               | CBAVD                        | male           | no disease                | no disease        | n.a.                  | n.a.                                                 | France            | Gervais 1996**                                 |
| #10          | R1070W / F508del               | CBAVD                        | male           | no disease                | sufficient (6y)   | 14-17 mmol/L          | 0.25y (diag)                                         | USA               | Groman 2002                                    |
| #11          | R1070W / F508del               | CAVD                         | male           | bronchiectasis            | n.a.              | 30 mmol/L             | Young's syndrome (CF-like)                           | France            | LeLannou 1995**                                |
| #12          | R1070W / F508del               | CAVD                         | male           | bronchiectasis            | n.a.              | n.a.                  | Young's syndrome (CF-like)                           | France            | LeLannou 1995**                                |
| #13          | R1070W / F508del               | CBAVD                        | male           | n.a.                      | pancreatitis      | n.a.                  | b=1966                                               | France            | Bienvenu T pers comm 2006                      |
| #14          | R1070W / F508del               | nonclassic CF                | female         | FEV=87%, FVC=53%          | sufficient        | <60 mmol/L            | 18y (diag, bronchitis), A.fumigatus, 40y(2006)       | France            | Bienvenu T pers comm 2006                      |
| #15          | R1070W / F508del               | nonclassic CF                | n.a.           | n.a.                      | n.a.              | 40 mmol/L             | birth (diag)                                         | France            | Ferec 1995**                                   |
| #16          | R1070W+1102-7t / F508del       | nonclassic CF                | female         | FEV=70%, FVC=72%          | insufficient      | 28 no units           | b=1958, diag=2003, CFRD, pregnancy (1), nasal polyps | USA               | CFF Registry 2005                              |
| #17          | R1070W+1102-7t / F508del       | nonclassic CF                | female         | FEV=78%, FVC=100%         | sufficient        | 20 no units           | b=1962, diag=2003, depression                        | USA               | CFF Registry 2005                              |
| #18          | R1070W / F508del               | nonclassic CF                | male           | FEV=85%, FVC=104%         | insufficient      | 36 no units           | b=1959, diag=1963                                    | USA               | CFF Registry 2005                              |
| #19          | R1070W / F508del               | nonclassic CF                | female         | mild disease              | insufficient      | 22 no units           | b=2000, diag=2003                                    | USA               | CFF Registry 2005                              |

## D) Patients bearing R1070W

| patient ID # | genotype (allele 1 / allele 2) | diagnosis (as per reference) | sex of patient | lung function and disease        | pancreatic status | sweat chloride levels | other traits and conditions                    | country of origin | references for patient data                            |
|--------------|--------------------------------|------------------------------|----------------|----------------------------------|-------------------|-----------------------|------------------------------------------------|-------------------|--------------------------------------------------------|
| #1           | R1070W / 2869insG              | CBAVD                        | male           | rhinosinusitis                   | sufficient        | 110 mEq/l             | 7t/7t, 40y (1995), azoospermia                 | Spain             | Casals 1995, Chillon 1995, Seibert 1996, Casals 2000** |
| #2           | R1070W / 3272-26A+M470V        | CBAVD                        | male           | n.a.                             | n.a.              | n.a.                  | tg10t7/tg11t7                                  | Turkey            | Dayagnac 2004                                          |
| #3*          | R1070W / n.a.                  | CBAVD                        | male           | n.a.                             | n.a.              | n.a.                  | tg11t7/tg10t7, 35y (2000)                      | France            | Jezequel 2000                                          |
| #4           | R1070W / G542X                 | CUAVD                        | male           | n.a.                             | n.a.              | n.a.                  | tg10t9/tg11t7, allergy, 43y (2000)             | France            | Jezequel 2000                                          |
| #5           | R1070W / N1303K                | nonclassic CF                | female         | recurrent infections             | n.a.              | intermed (2x)         | 4.5y (2005)                                    | USA               | McGinnis 2005                                          |
| #6           | R1070W / S1235R                | CBAVD                        | male           | n.a.                             | n.a.              | 60 mmol/L             | 33y (1998)                                     | France            | de la Taille 1998**                                    |
| #7           | R1070W / 5T-12TG               | nonclassic CF                | female         | chronic bronchitis               | n.a.              | positive              | growth deficit                                 | Spain             | Casals T pers comm 2006                                |
| #8           | R1070W+R668C / K710X           | classic                      | female         | bronchiectasis                   | insufficient      | positive              | n.a.                                           | Spain             | Casals T pers comm 2006                                |
| #9           | R1070W / D1152H                | CBAVD                        | male           | FEV=37%, FVC=46%, bronchiectasis | sufficient        | <60 mmol/L            | 37y (diag), PA (40y), 49y (2006), osteoporosis | France            | Bienvenu T pers comm 2006                              |
| #10*         | R1070W / F191V                 | n.a.                         | n.a.           | n.a.                             | n.a.              | n.a.                  | n.a. (new entry; data pending)                 | USA               | CFF Registry 2005                                      |

## E) Patients bearing R1070P

| patient ID # | genotype (allele 1 / allele 2) | diagnosis (as per reference) | sex of patient | lung function and disease | pancreatic status   | sweat chloride levels | other traits and conditions                         | country of origin | references for patient data                                 |
|--------------|--------------------------------|------------------------------|----------------|---------------------------|---------------------|-----------------------|-----------------------------------------------------|-------------------|-------------------------------------------------------------|
| #1           | R1070P / 2143delT              | classic CF                   | male           | mild obstructive disease  | insufficient (>25y) | 121 mmol/L            | b=1969, 11y (diag), nasal polyps, FEV=71%, FVC=106% | USA (Polish)      | Shrimpton 1997, Canadian Database 2007, CFF Registry 2005** |
| #2*          | R1070P / F508del               | CF                           | male           | n.a.                      | n.a.                | n.a.                  | n.a.                                                | Northern Ireland  | Doerk T, Canadian Database 2007**                           |
